# Supplementary material
Source: publisher figshare collection journal article supplement (https://rs.figshare.com/ndownloader/files/8955136)
Supplement: Supplementary file [file 8955136]

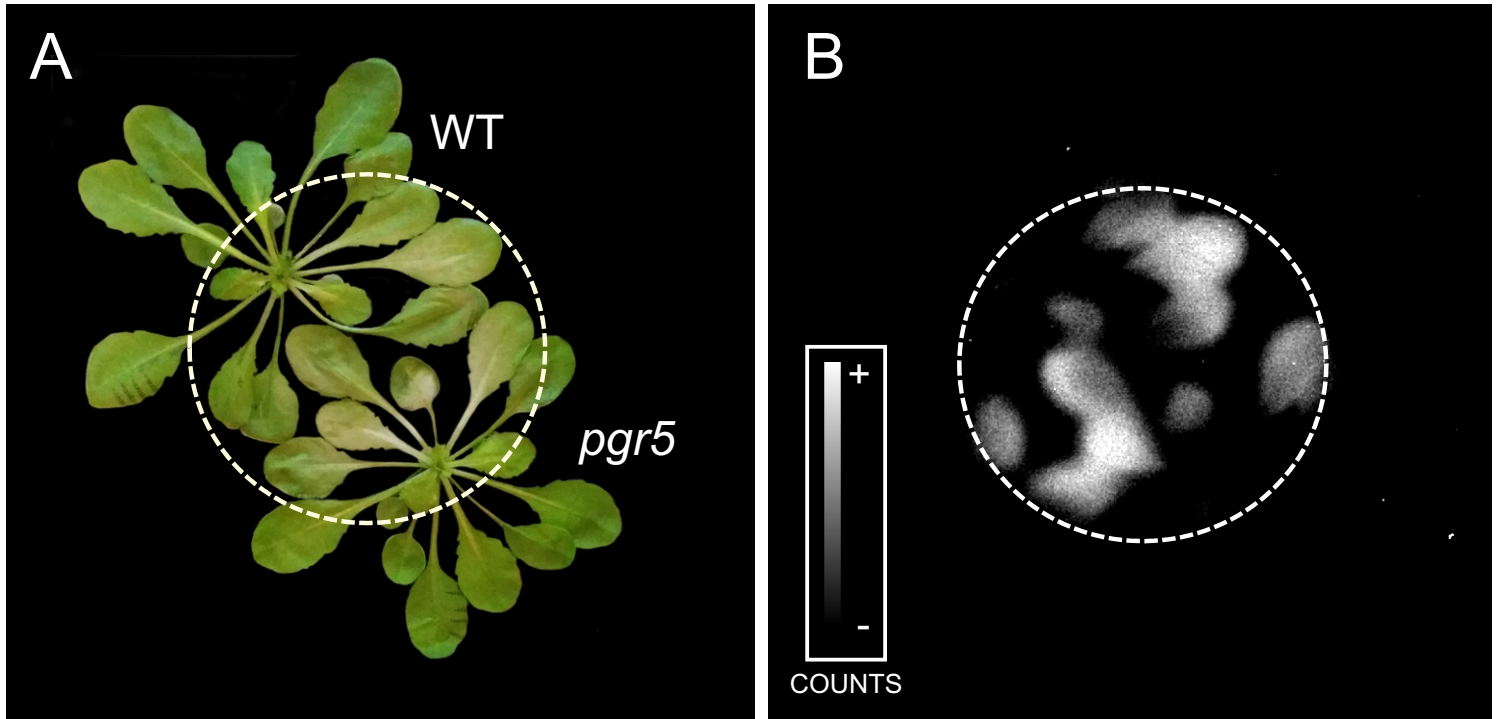

High light-induced lipid peroxidation in WT (*gl1*) and *pgr5* plants.

**A.** *gl1* (upper) and *pgr5* (lower) rosettes after localised treatment with high light (area within dashed circle)

**B.** Autoluminescence imaging of plants after light stress. Scale shows relative photon counts.
